# Supplementary material for: Evaluation of Candidate Reference Genes for Gene Expression Analysis in Wild Lamiophlomis rotata
Source: MDPI journal article supplement (doi:10.3390/genes14030573), 2023-02-24
Supplement: s1 [file s1]

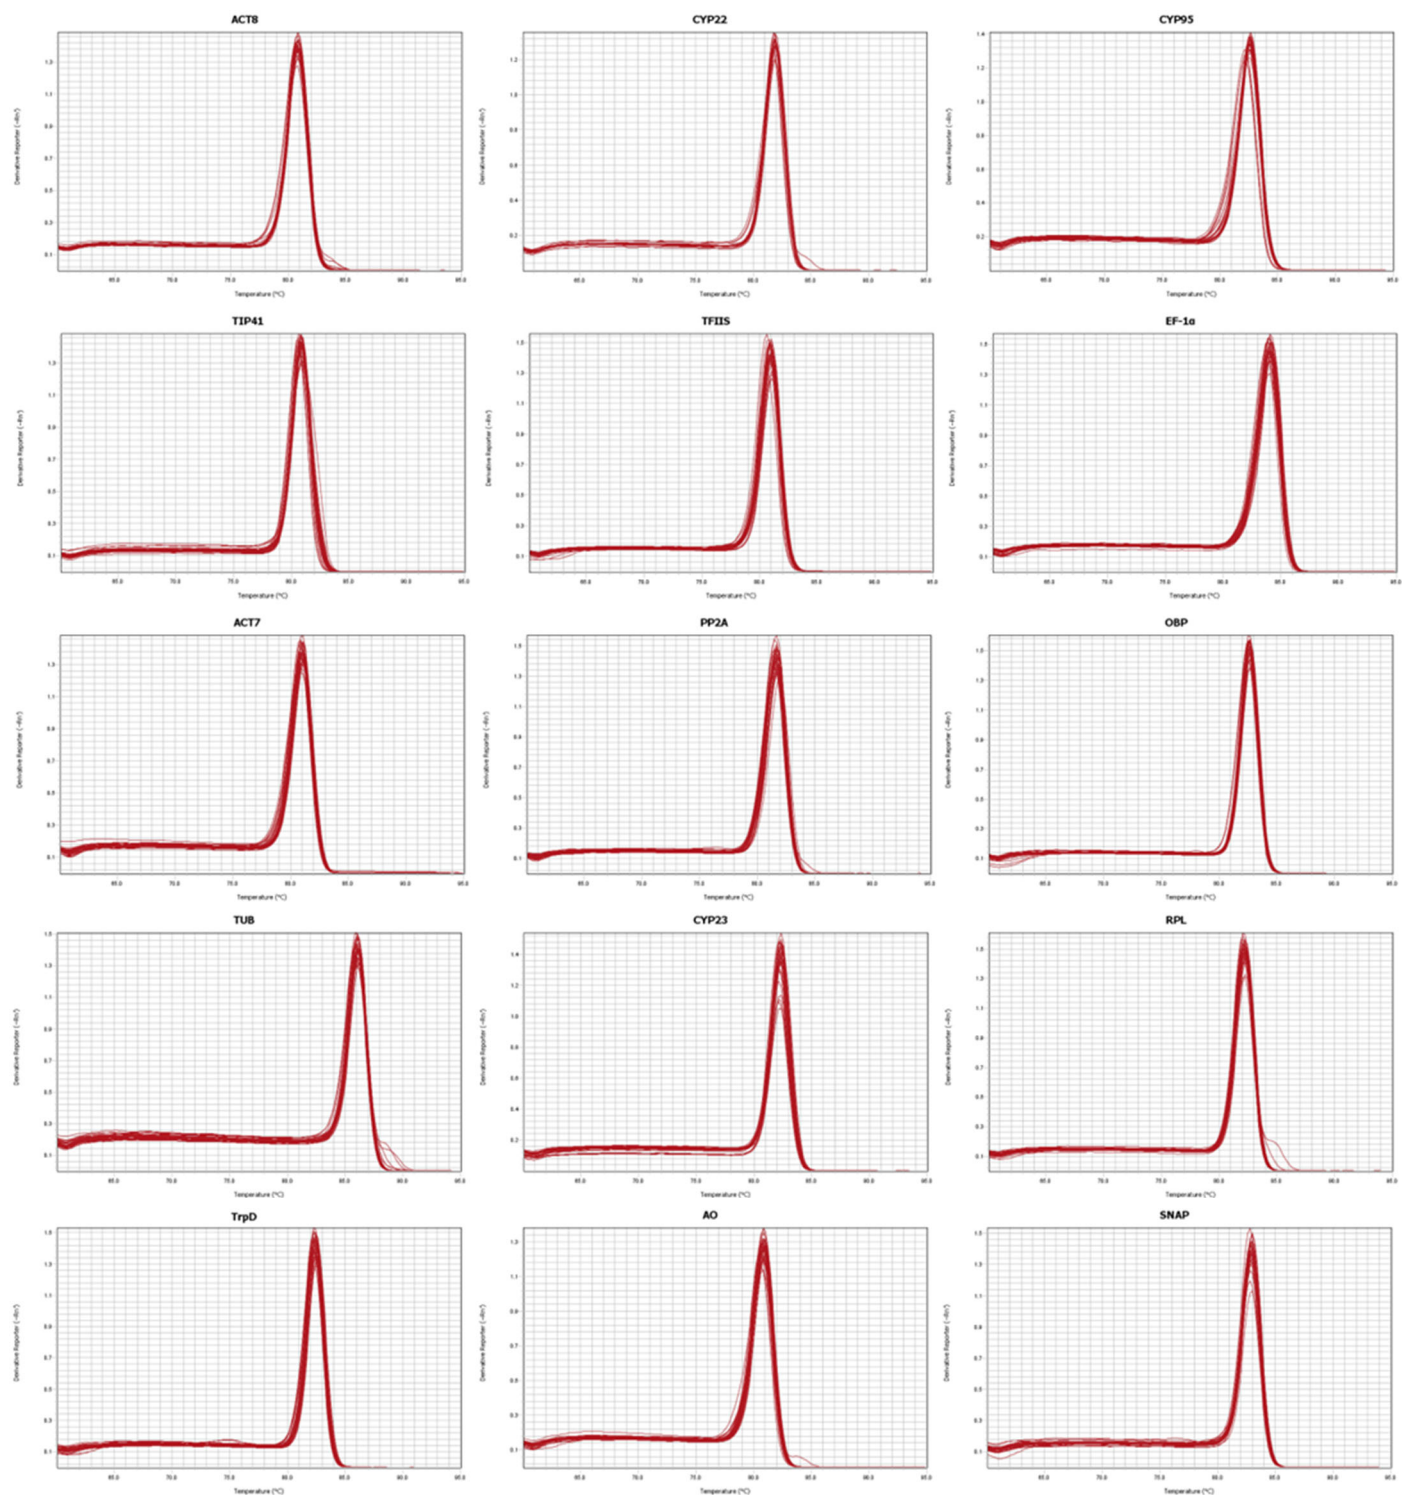

**Figure S1.** Melting peaks of candidate reference genes. The melting curve of every reference gene by RT-qPCR is a single peak, which indicates the specificity and reliability of the primer pair used for the further analysis of gene expression.
